# Supplementary material for: Bufotalin Suppresses Proliferation and Metastasis of Triple-Negative Breast Cancer Cells by Promoting Apoptosis and Inhibiting the STAT3/EMT Axis
Source: MDPI journal article supplement (doi:10.3390/molecules28196783), 2023-09-23
Supplement: s1 [file s1]

# Bufotalin Suppresses Proliferation and Metastasis of Triple-Negative Breast Cancer Cells by Promoting Apoptosis and Inhibiting the STAT3/EMT Axis

So Jin Park <sup>1</sup> and Hye Jin Jung <sup>1,2,3,\*</sup>

<sup>1</sup> Department of Life Science and Biochemical Engineering, Graduate School, Sun Moon University, Asan 31460, Republic of Korea; psj1867@naver.com

<sup>2</sup> Department of Pharmaceutical Engineering and Biotechnology, Sun Moon University, Asan 31460, Republic of Korea

<sup>3</sup> Genome-Based BioIT Convergence Institute, Sun Moon University, Asan 31460, Republic of Korea

\* Correspondence: poka96@sunmoon.ac.kr; Tel.: +82-41-530-2354; Fax: +82-41-530-2939

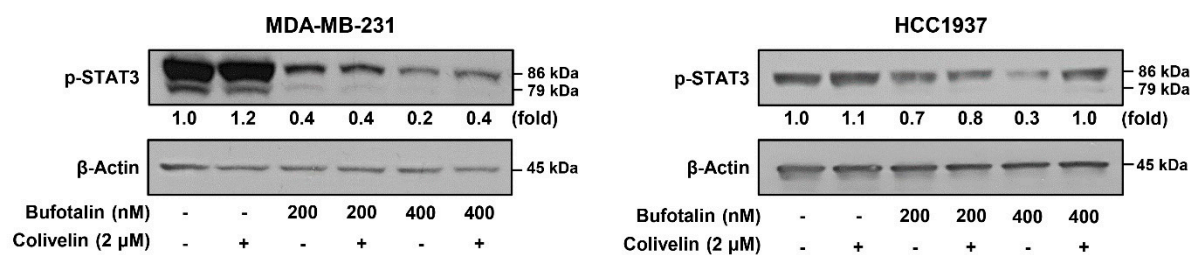

**Figure S1.** Colivelin partially restores the inhibitory effect of bufotalin on STAT3 phosphorylation in TNBC cell lines. MDA-MB-231 and HCC1937 cells were incubated for 24 h after treatment with colivelin and bufotalin. Protein expression levels were measured by Western blotting. The levels of  $\beta$ -actin were used as a loading control and band intensity was measured by densitometry. The expression ratio of p-STAT3 to  $\beta$ -actin in untreated control cells was normalized to onefold.

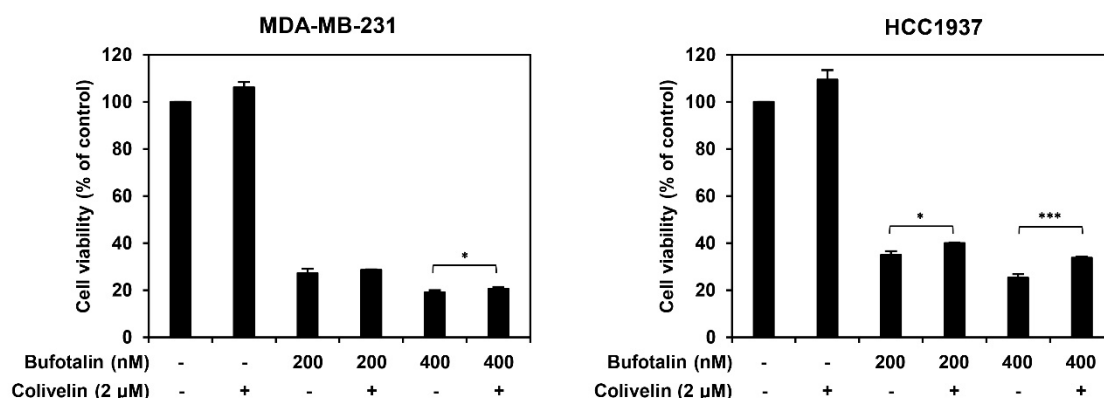

**Figure S2.** Colivelin partially restores the inhibitory effect of bufotalin on cell viability in TNBC cell lines. MDA-MB-231 and HCC1937 cells were incubated for 48 h after treatment with colivelin and bufotalin. The CellTiter-Glo<sup>®</sup> luminescent assay was used to measure cell viability. \*  $p < 0.05$ , \*\*\*  $p < 0.001$ .
